# Supplementary material for: Spherical assembled microstructures: fabrication and their stabilization with assistance of supercritical carbon dioxide
Source: Royal Society of Chemistry journal article supplement (doi:10.1039/c1sm05041a), 2011-01-01
Supplement: c1sm05041a.pdf [file c1sm05041a.pdf]

## Electronic Supplementary Information

# Spherical Assembled Microstructures: Fabrication and Their Stabilization with Assistance of Supercritical Carbon Dioxide

*Qiuyan Yang, Jiafu Chen, Qun Xu\*, Linghao He, Zhimin Chen, Jianwei Fu*

College of Materials Science and Engineering, Zhengzhou University, Zhengzhou 450052, P. R.  
China.

\*E-mail: qunxu@zzu.edu.cn; Tel.: +86 371 67767827; fax: +86 371 67767827.

\*To whom correspondence should be addressed: College of Materials Science and Engineering,  
Zhengzhou University, Zhengzhou 450052, China. Tel: (+) 86-371-67767827. Fax: (+)  
86-371-67767827. Email: qunxu@zzu.edu.cn

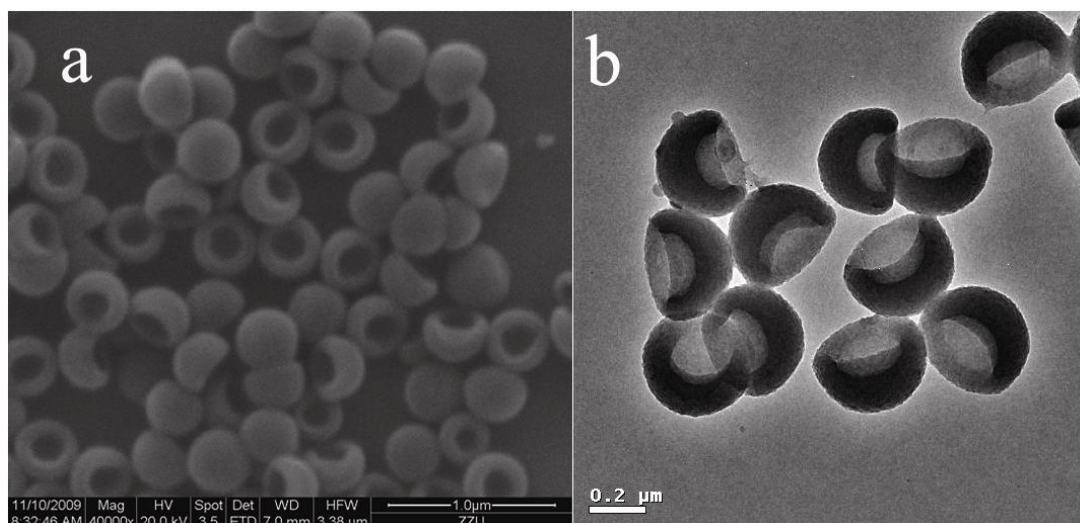

**Figure S1** SEM and TEM images of the hollow PS-DVB colloids containing 18 wt% DVB.

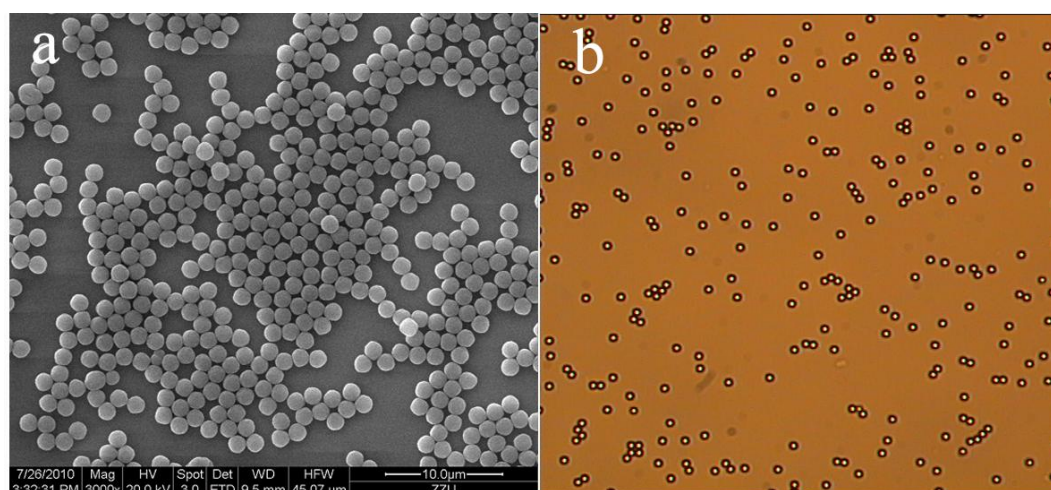

**Figure S2** SEM images (a) and the optical microscope image (b) of the PS particles with the mean diameter of 1.5 μm.
